# Supplementary material for: Boosted Visible-Light Photodegradation of Methylene Blue by V and Co Co-Doped TiO2
Source: PubMed Central journal article supplement (PMC6213182; doi:10.3390/ma11101946), 2018-10-11
Supplement: materials-11-01946-s001.pdf [file materials-11-01946-s001.pdf]

## Supplementary Information

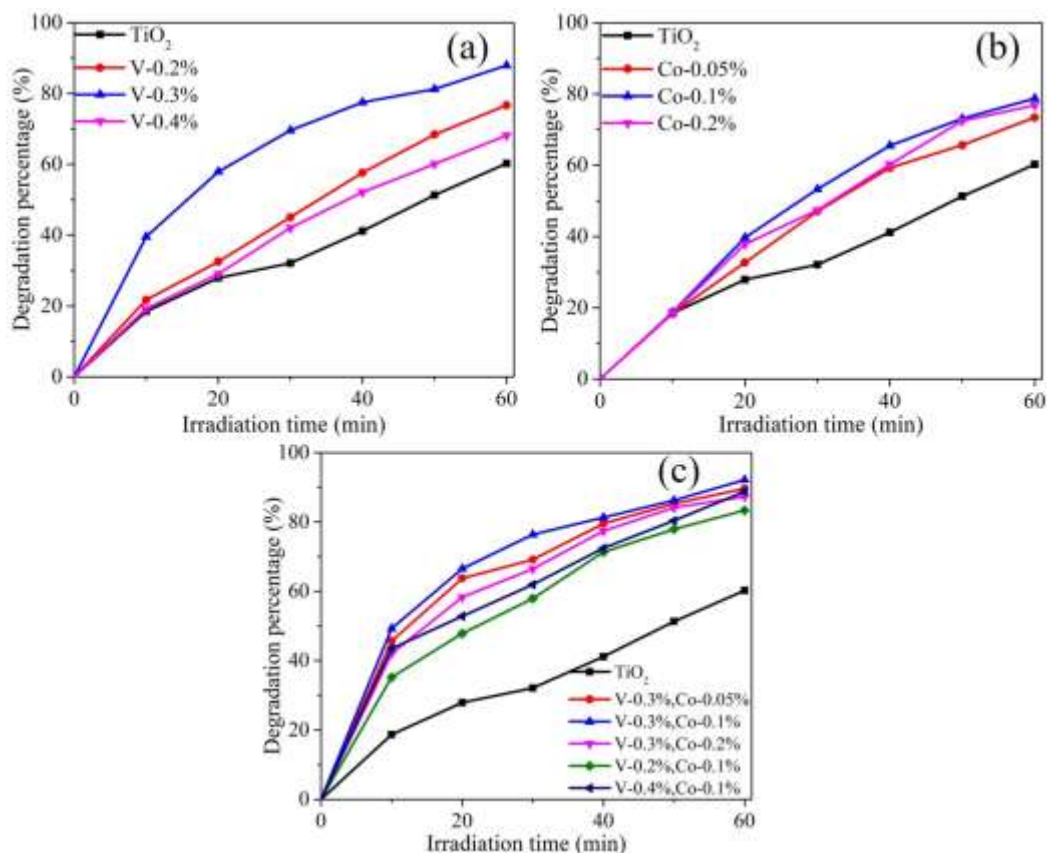

**Figure S1.** Degradation percentage of MB by V and Co doped TiO<sub>2</sub> samples prepared at pH 1.5 and sintered at 500 °C. (a) V-TiO<sub>2</sub> of different doping quantities; (b) Co-TiO<sub>2</sub> of different doping quantities; (c) (V, Co)-TiO<sub>2</sub> of different doping quantities.

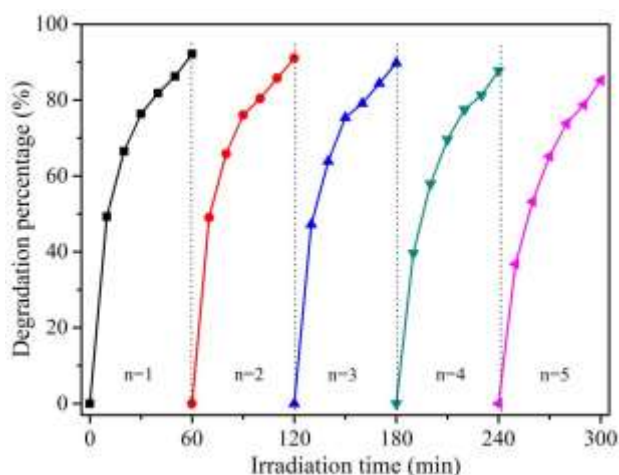

**Figure.S2.** Five recyclable visible-light catalytic degradation experiments using (V, Co)-TiO<sub>2</sub> photocatalyst in 0.01g L<sup>-1</sup> MB solution.

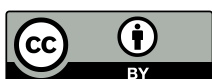

© 2018 by the authors. Submitted for possible open access publication under the terms and conditions of the Creative Commons Attribution (CC BY) license (<http://creativecommons.org/licenses/by/4.0/>).
